# Supplementary material for: Quantitative susceptibility mapping for detection of kidney stones, hemorrhage differentiation and cyst classification in ADPKD
Source: bioRxiv or medRxiv preprint supplement (doi:10.1101/2024.02.24.24303322), 2024-02-27
Supplement: Supplementary file [file media-1.pdf]

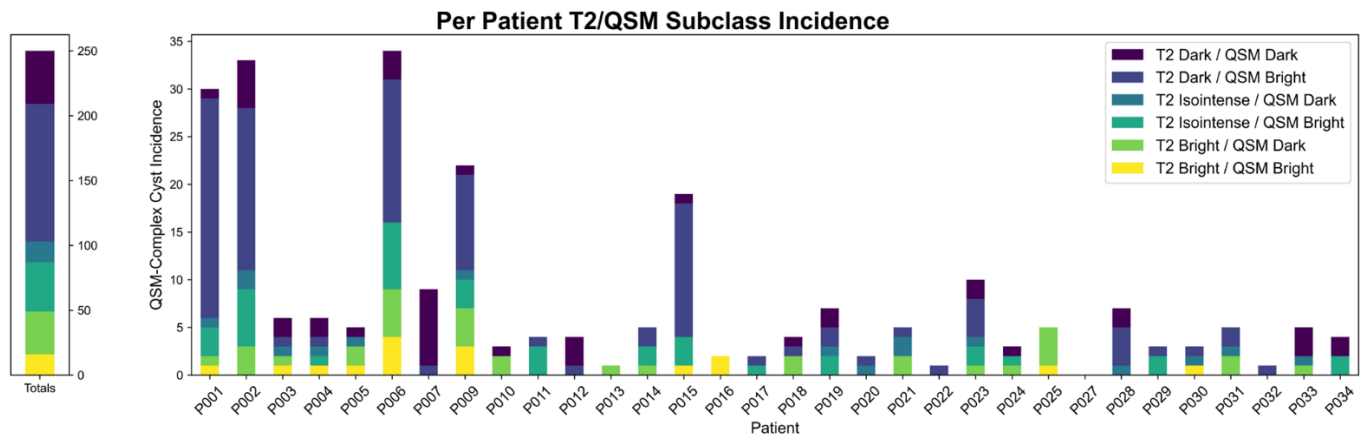

Figure S1. Distribution of the T2/QSM cyst subtypes across individual subjects
